# Supplementary material for: Adult Reconstruction Fellowship Interviewee Perceptions of Virtual vs In-Person Interview Formats
Source: PubMed Central journal article supplement — Arthroplast Today. 2021 Aug 7;10:154–9. doi: 10.1016/j.artd.2021.04.011 (PMC8358093; doi:10.1016/j.artd.2021.04.011), 2021-08-07
Supplement: mmc5.pdf [file mmc5.pdf]

# CONFLICT OF INTEREST STATEMENT

## *American Association of Hip and Knee Surgeons*

(Adopted from the American Academy of Orthopaedic Surgeons disclosure statement)

The following form **must be filled out completely and submitted by each author (example, 6 authors, 6 forms). All items require a response. If there is no relevant disclosure for a given item, enter "None."**

Manuscript Title: Adult Reconstruction Fellowship Interviewee Perceptions of Virtual vs In-Person Interview Formats

---

1. Royalties from a company or supplier (The following conflicts were disclosed)
2. Speakers bureau/paid presentations for a company or supplier (The following conflicts were disclosed)
- 3A. Paid employee for a company or supplier (The following conflicts were disclosed)
- 3B. Paid consultant for a company or supplier (The following conflicts were disclosed)
- 3C. Unpaid consultants for a company or supplier (The following conflicts were disclosed)
4. Stock or stock options in a company or supplier (The following conflicts were disclosed)
5. Research support from a company or supplier as a Principal Investigator (The following conflicts were disclosed)
6. Other financial or material support from a company or supplier (The following conflicts were disclosed)
7. Royalties, financial or material support from publishers (The following conflicts were disclosed)
8. Medical/Orthopaedic publications editorial/governing board (The following conflicts were disclosed)
9. Board member/committee appointments for a society (The following conflicts were disclosed)

**Each author must sign AND print or type his/her name, date and submit a separate form**

In addition, one BLINDED Conflict of Interest form (no author names used) should be submitted per manuscript with all author disclosures.

Neil Pathak

*Neil Pathak*

11/1/2020

---

Author Name (Print or Type)

Author Signature

Date
